# Supplementary material for: In situ embedding of Mo2C/MoO3−x nanoparticles within a carbonized wood membrane as a self-supported pH-compatible cathode for efficient electrocatalytic H2 evolution
Source: Royal Society of Chemistry journal article supplement (doi:10.1039/d0dt01690j), 2020-01-01
Supplement: d0dt01690j1.pdf [file d0dt01690j1.pdf]

## Electronic Supplementary Information for

### ***In situ* embedding Mo<sub>2</sub>C/MoO<sub>3-x</sub> nanoparticles within a carbonized wood membrane as a self-supported pH-compatible cathode for efficient electrocatalytic H<sub>2</sub> evolution**

Fang Wang,<sup>a,b,c</sup> Wanan Deng,<sup>a,b,c</sup> Yanan Li,<sup>a,b,c</sup> Shixiong Min<sup>\*a,b,c</sup> and Zhengguo Zhang<sup>a,b,c</sup>

<sup>a</sup> School of Chemistry and Chemical Engineering, Key Laboratory of Electrochemical Energy Conversion Technology and Application, North Minzu University, Yinchuan, 750021, P. R. China.

<sup>b</sup> Key Laboratory of Chemical Engineering and Technology, State Ethnic Affairs Commission, North Minzu University, Yinchuan, 750021, P. R. China.

<sup>c</sup> Ningxia Key Laboratory of Solar Chemical *Conversion Technology*, North Minzu University, Yinchuan 750021, P. R. China.

\*E-mail: [sxmin@nun.edu.cn](mailto:sxmin@nun.edu.cn)

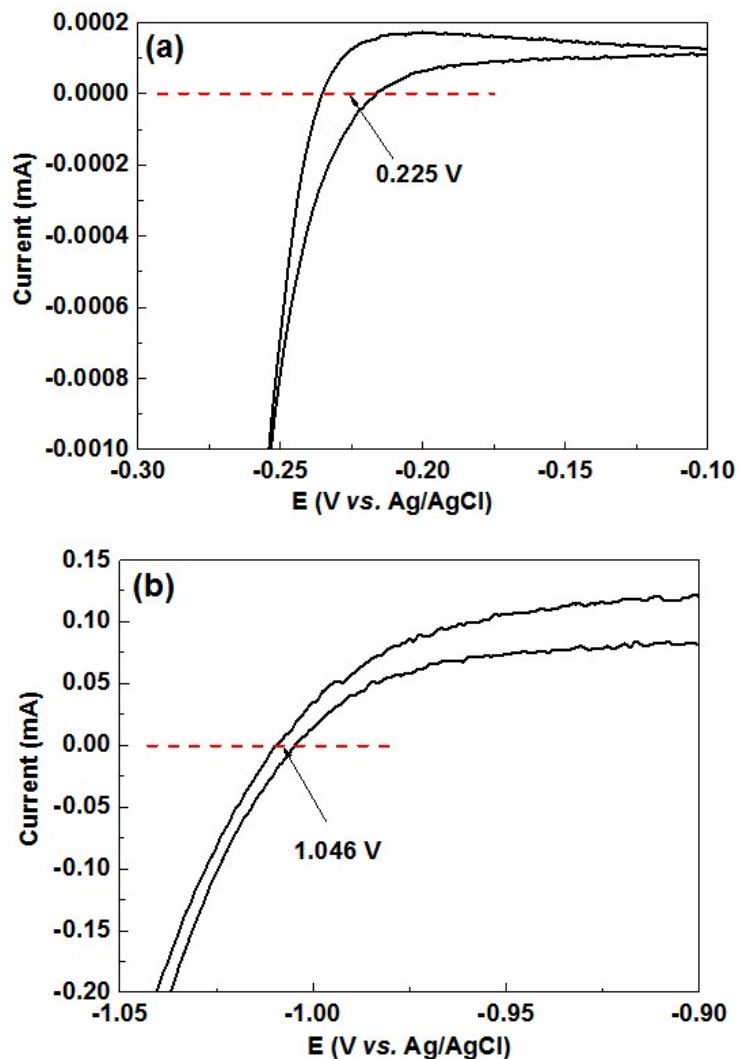

**Fig. S1** (a) The cyclic voltammograms (CV) of Pt wire working electrode in the high purity hydrogen saturated 0.5 M H<sub>2</sub>SO<sub>4</sub> and (b) 1 M KOH electrolyte solution. The CV scans were run at a scan rate of 5 mV s<sup>-1</sup>, and the average of the two potentials at which the current crossed zero was taken to be the thermodynamic potential for the hydrogen electrode.

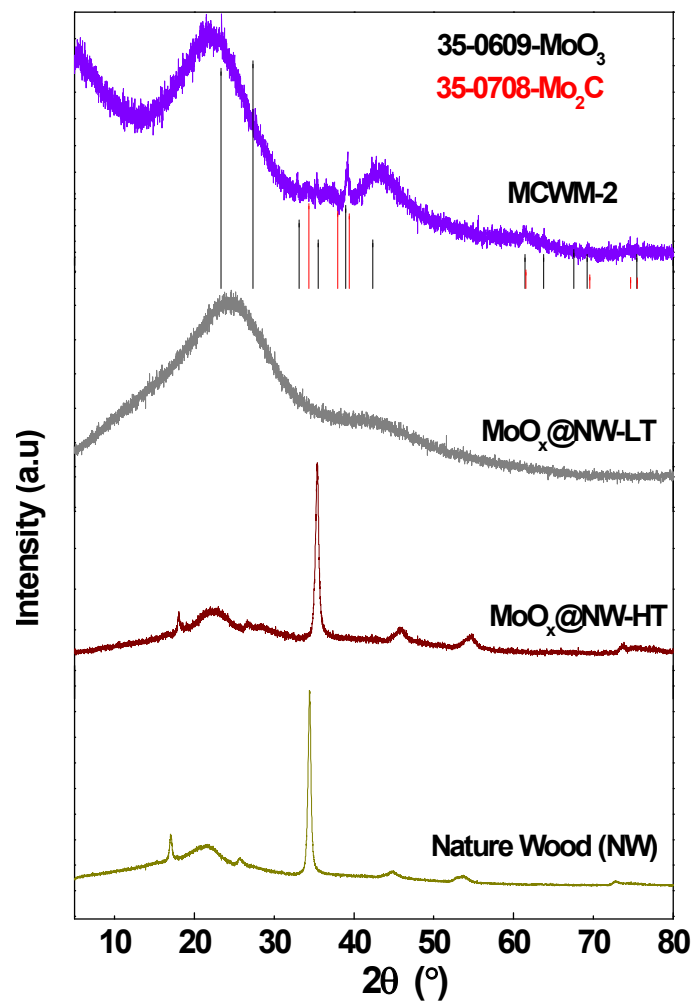

**Fig.S2** XRD patterns of the NW, MoO<sub>x</sub>@NW-HT, MoO<sub>x</sub>@NW-LT, and MCWM-2 electrode. The marks “I”, “II”, and “III” in the XRD spectrum of the NW slice indicate the diffraction peaks of (002) planes (I) and amorphous phase (II) of the cellulose and crystalline hemicellulose (III), respectively.

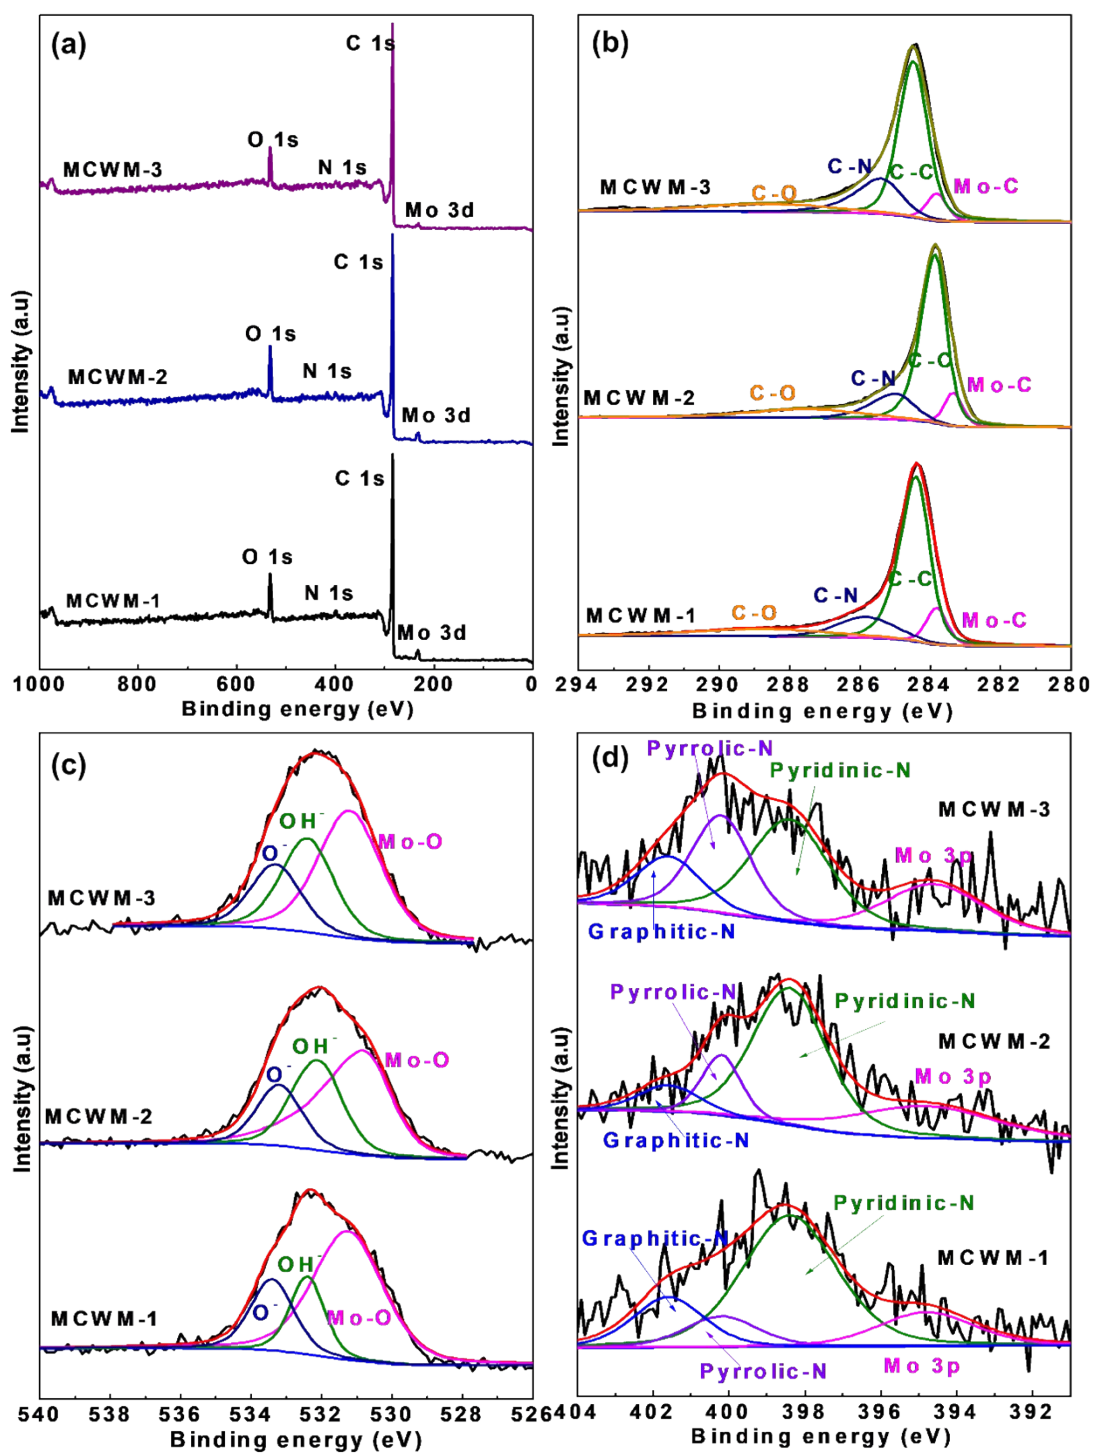

Fig. S3 (a) XPS survey spectra. High-resolution (b) C 1s, (c) O 1s, and (d) N 1s XPS spectra of the MCWM-1, MCWM-2 and MCWM-3 electrodes.

**Table S1** ICP-OES analysis for the MCWM electrodes.

| Sample | Loading amount of Mo (mg cm <sup>-2</sup> ) |
|--------|---------------------------------------------|
| MCWM-1 | 0.5933                                      |
| MCWM-2 | 0.5965                                      |
| MCWM-3 | 0.5980                                      |

**Table S2** The summary of content for different Mo species in different electrodes.

| Sample                                                                        | Mo <sub>2</sub> C | MoO <sub>3-x</sub> |                  | Mo <sub>2</sub> C/Mo <sub>3-x</sub> |
|-------------------------------------------------------------------------------|-------------------|--------------------|------------------|-------------------------------------|
|                                                                               |                   | Mo <sup>5+</sup>   | Mo <sup>6+</sup> |                                     |
| MCWM-1                                                                        | 15.03%            | 4.97%              | 80.00%           | 0.186                               |
| MCWM-2                                                                        | 10.40%            | 5.21%              | 84.39%           | 0.116                               |
| MCWM-3                                                                        | 25.93%            | 5.99%              | 68.08%           | 0.350                               |
| MCWM-2 after<br>HER stability test<br>in 0.5 M H <sub>2</sub> SO <sub>4</sub> | 27.24%            | 5.11%              | 67.65%           | 0.374                               |
| MCWM-2 after<br>HER stability test<br>in 1M KOH                               | 23.24%            | 5.24%              | 71.52%           | 0.303                               |

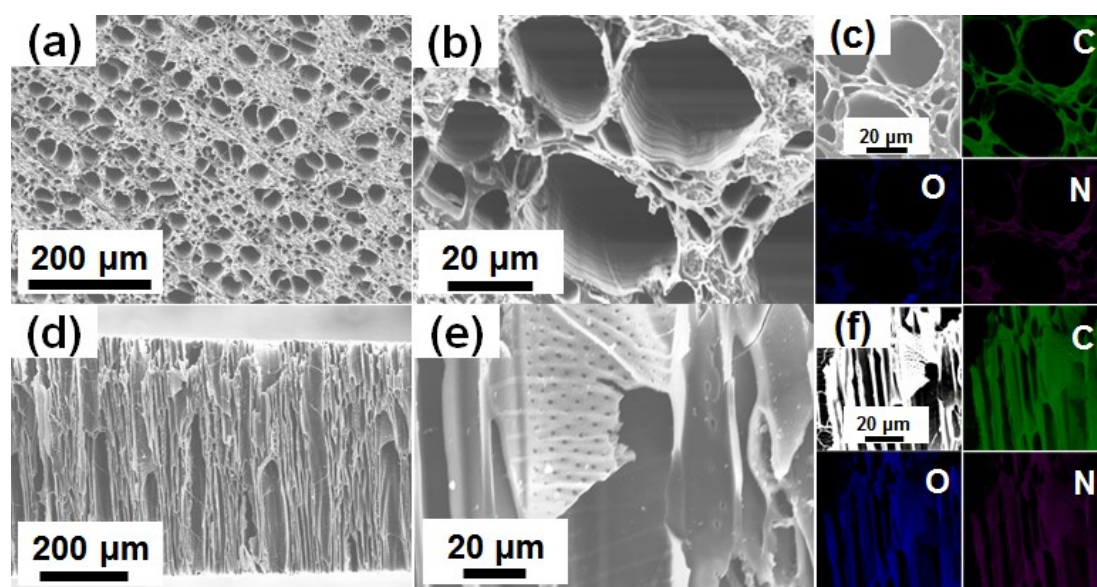**Fig. S4** (a, b) Top-view SEM images of the CWM electrode and (c) the corresponding EDS element mapping images. (d, e) Side-view SEM images of the CWM electrode and (f) the corresponding EDS element mapping images.

**Table S3.** HER activities of various non-noble metal electrocatalysts in 0.5 M H<sub>2</sub>SO<sub>4</sub> solution.

| Sample                                     | Overpotential (mV) at 10 mA cm <sup>-2</sup> | Tafel slop (mV dec <sup>-1</sup> ) | Self-supported | Reference |
|--------------------------------------------|----------------------------------------------|------------------------------------|----------------|-----------|
| MCWM-2                                     | 186                                          | 134                                | Yes            | This work |
| MoP NA/CC                                  | 124                                          | 58                                 | Yes            | 1         |
| Mo <sub>2</sub> C@NC                       | 60                                           | -                                  | No             | 2         |
| MoC@GC                                     | 124                                          | 43                                 | No             | 3         |
| N <sub>3</sub> P-Doped Mo <sub>2</sub> C@C | 141                                          | 71                                 | No             | 4         |
| P-MoO <sub>3-x</sub>                       | 166                                          | 42                                 | No             | 5         |
| Mesoporous MoO <sub>3-x</sub>              | 179                                          | 72                                 | No             | 6         |
| α-Mo <sub>2</sub> C                        | 198                                          | 56                                 | No             | 7         |
| Mo <sub>2</sub> C/GCSs                     | 200                                          | 62.5                               | No             | 8         |
| Mo <sub>2</sub> C                          | 208                                          | 56                                 | No             | 9         |
| Mo <sub>2</sub> N/CNT                      | 218                                          | 133                                | No             | 10        |
| MoP                                        | 246                                          | 60                                 | No             | 11        |
| MoC <sub>2</sub> NWAs/CFP                  | 190                                          | 68                                 | Yes            | 12        |

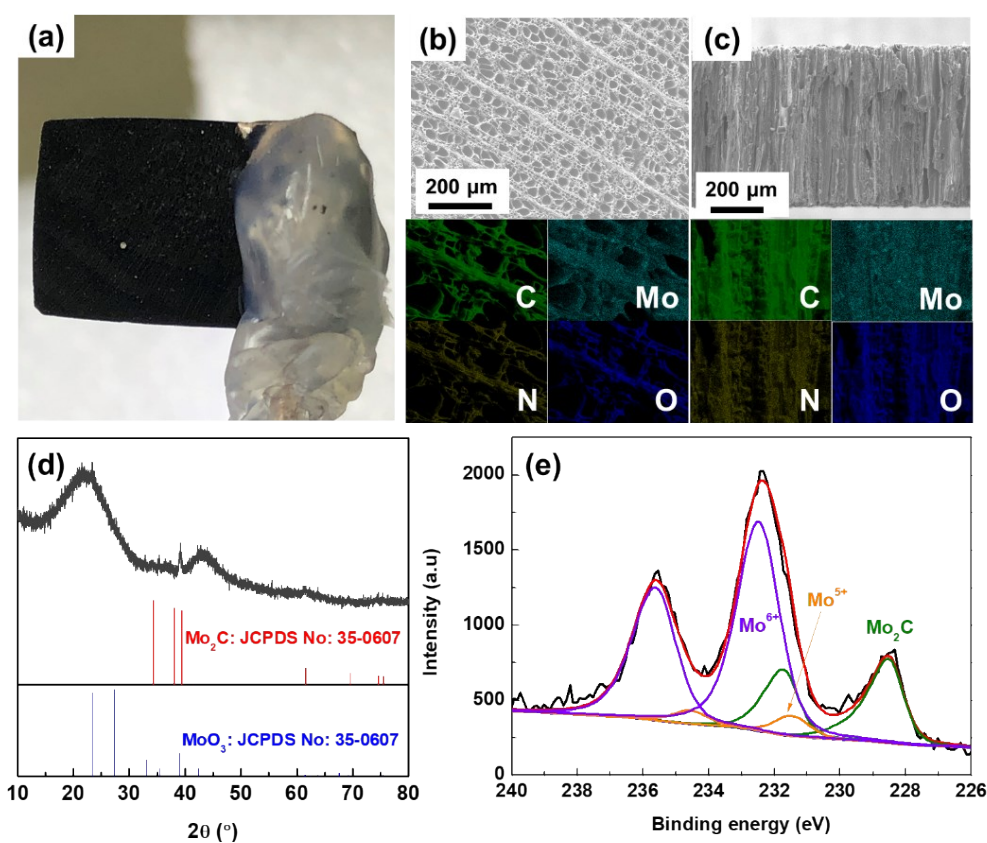

**Fig. S5** (a) Digital photo of the MCWM-2 electrode after a 12 h of HER stability test in 0.5 M H<sub>2</sub>SO<sub>4</sub>. (b) Top-view and (c) side-view SEM images of the MCWM-2 electrode and the corresponding EDX elemental maps. (d) XRD pattern and (e) Mo3d XPS spectrum of the used MCWM-2 electrode after a 12 h of HER stability test in 0.5 M H<sub>2</sub>SO<sub>4</sub>.

**Table S4** HER activities of various non-noble metal electrocatalysts in 1.0 M KOH solution.

| Sample                                                  | Overpotential (mV) at 10 mA cm <sup>-2</sup> | Tafel slop (mV dec <sup>-1</sup> ) | Self-supported | Reference |
|---------------------------------------------------------|----------------------------------------------|------------------------------------|----------------|-----------|
| MCWM-2                                                  | 275.3                                        | 134                                | Yes            | This work |
| MoC <sub>2</sub> NWAs/CFP                               | 170                                          | 72                                 | Yes            | 12        |
| γ-Mo <sub>2</sub> N@NC                                  | 85                                           | 54                                 | No             | 13        |
| Mo <sub>2</sub> C/carbon Microflowers                   | 100                                          | 65                                 | No             | 14        |
| Mo <sub>2</sub> C@NC                                    | 124                                          | 60                                 | No             | 15        |
| MoC <sub>x</sub>                                        | 151                                          | 59                                 | No             | 16        |
| MoC@NC                                                  | 170                                          | 51                                 | No             | 17        |
| Mo <sub>2</sub> C                                       | 190                                          | 54                                 | No             | 9         |
| P-MoO <sub>3-x</sub>                                    | 233                                          | 53                                 | No             | 5         |
| Core-shell MoO <sub>3</sub> -MoS <sub>2</sub> nanowires | 250                                          | 60                                 | No             | 18        |
| Mo <sub>2</sub> C                                       | 290                                          | 216                                | No             | 19        |
| MoO <sub>2</sub> /rGO                                   | 310                                          | 68                                 | No             | 20        |
| Mo <sub>2</sub> C/NGA                                   | 365                                          | -                                  | Yes            | 21        |

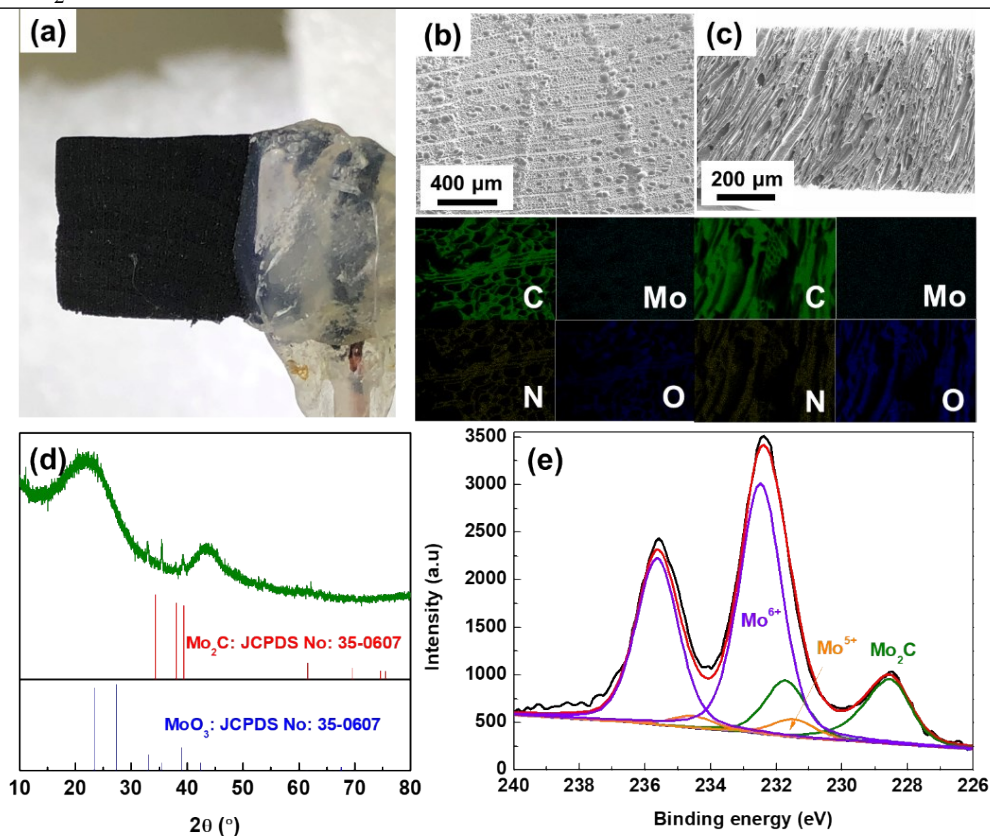

**Fig. S6** (a) Digital photo of the MCWM-2 electrode after a 12 h of HER stability test in 1.0 M KOH. (b) Top-view and (c) side-view SEM images of the MCWM-2 electrode and the corresponding EDX elemental maps. (d) XRD pattern and (e) Mo3d XPS spectrum of the used MCWM-2 electrode after a 12 h of HER stability test in 1.0 M KOH.

## References

1. Z. Pu, S. Wei, Z. Chen, S. Mu, *Appl. Catal. B: Environ.* 2016, **196**, 193-198.
2. R. Ma, Y. Zhou, Y. Chen, P. Li, Q. Liu, J. Wang, *Angew. Chem. Int. Edit.* 2015, **54**, 14723-14727.
3. Z. Shi, Y. Wang, H. Lin, H. Zhang, M. Shen, S. Xie, Y. Zhang, Q. Gao, Y. Tang, *J. Mater. Chem. A* 2016, **4**, 6006-6013.
4. Y.-Y. Chen, Y. Zhang, W.-J. Jiang, X. Zhang, Z. Dai; L.-J. Wan, J.-S. Hu, *ACS Nano* 2016, **10**, 8851-8860.
5. L. Li, T. Zhang, J. Yan, X. Cai, S. Liu, *Small* 2017, **13**, 1700441.
6. J. Han, X. Ji, X. Ren, G. Cui, L. Li; F. Xie, *J. Mater. Chem. A* 2018, **6**, 12974-12977.
7. L. Ma; R. L. Ting, V. Molinari, C. Giordano, B. S. Yeo, *J. Mater. Chem. A* 2015, **3**, 8361-8368.
8. W. Cui, N. Cheng, Q. Liu, C. Ge, A. M. Asiri, X. Sun, *ACS Catal.* 2014, **4**, 2658-2661.
9. H. Vrubel, X. Hu, *Angew. Chem. Int. Edit.* 2012, **51**, 12703-12706.
10. M. Meng, H. Yan, Y. Jiao, A. Wu, X. Zhang, R. Wang, C. Tian, *RSC Adv.* 2016, **6**, 29303-29307.
11. X. Chen, D. Wang, Z. Wang, P. Zhou, Z. Wu, F. Jiang, *Chem. Commun.* 2014, **50**, 11683-11685.
12. X. Zhang, F. Zhou, W. Pan, Y. Liang and R. Wang, *Adv. Funct. Mater.*, 2018, **28**, 1804600.
13. Z. Lv, M. Tahir, X. Lang, G. Yuan, L. Pan, X. Zhang, J.-J. Zou, *J. Mater. Chem.*



- A* 2017, **5**, 20932-20937.
14. Y. Huang, Q. Gong, X. Song, K. Feng, K. Nie, F. Zhao, Y. Wang, M. Zeng, J. Zhong, Y. Li, *ACS Nano* 2016, **10**, 11337-11343.
  15. Y. Liu, G. Yu, G.-D. Li, Y. Sun, T. Asefa, W. Chen, X. Zou, *Angew. Chem. Int. Edit.* 2015, **54**, 10752-10757.
  16. H.-W. Liang, S. Brüller, R. Dong, J. Zhang, X. Feng, K. Müllen, *Nat. Commun.* 2015, **6**, 7992.
  17. Z. Cheng, J. Gao, Q. Fu, C. Li, X. Wang, Y. Xiao, Y. Zhao, Z. Zhang, L. Qu, *ACS Appl. Mater. Inter.* 2017, **9**, 24608-24615.
  18. Z. Chen, D. Cummins, B. N. Reinecke, E. Clark, M. K. Sunkara, T. F. Jaramillo, *Nano Lett.* 2011, **11**, 4168-4175.
  19. J. Wang, H. Xia, Z. Peng, C. Lv, L. Jin, Y. Zhao, Z. Huang, C. Zhang. *ChemSusChem* 2016, **9**, 855-862.
  20. L. Wu, X. Wang, Y. Sun, Y. Liu, J. Li, *Nanoscale* 2015, **7**, 7040-7044.
  21. Y. Zhou, J. Niu, G. Zhang, M. Yu and F. Yang, *Environ. Res.*, 2020, **184**, 109283
